# Supplementary material for: Room temperature synthesis of hydrophilic Ln3+-doped KGdF4 (Ln = Ce, Eu, Tb, Dy) nanoparticles with controllable size: energy transfer, size-dependent and color-tunable luminescence properties
Source: Royal Society of Chemistry journal article supplement (doi:10.1039/c2nr30338h), 2012-01-01
Supplement: c2nr30338h.pdf [file c2nr30338h.pdf]

## Supporting Information

### Room Temperature Synthesis of Hydrophilic $\text{Ln}^{3+}$ -doped $\text{KGdF}_4$ ( $\text{Ln} = \text{Ce}, \text{Eu}, \text{Tb}, \text{Dy}$ ) Nanoparticles with Controllable Size: Energy Transfer, Size-Dependent and Color-Tunable Luminescence Properties

Dongmei Yang,<sup>a,b</sup> Guogang Li,<sup>a,b</sup> Xiaojiao Kang,<sup>a,b</sup> Ziyong Cheng,<sup>a</sup> Ping'an Ma,<sup>a</sup> Chong Peng,<sup>a,b</sup> Hongzhou Lian,<sup>a</sup> Chunxia Li,<sup>\*a</sup> and Jun Lin<sup>\*a</sup>

<sup>a</sup> State Key Laboratory of Rare Earth Resource Utilization, Changchun Institute of Applied Chemistry, Chinese Academy of Sciences, Changchun 13002, P.R. China. E-mail: cxli@ciac.jl.cn, jlin@ciac.jl.cn

<sup>b</sup> Graduate University of the Chinese Academy of Sciences, Beijing 100049, P.R. China

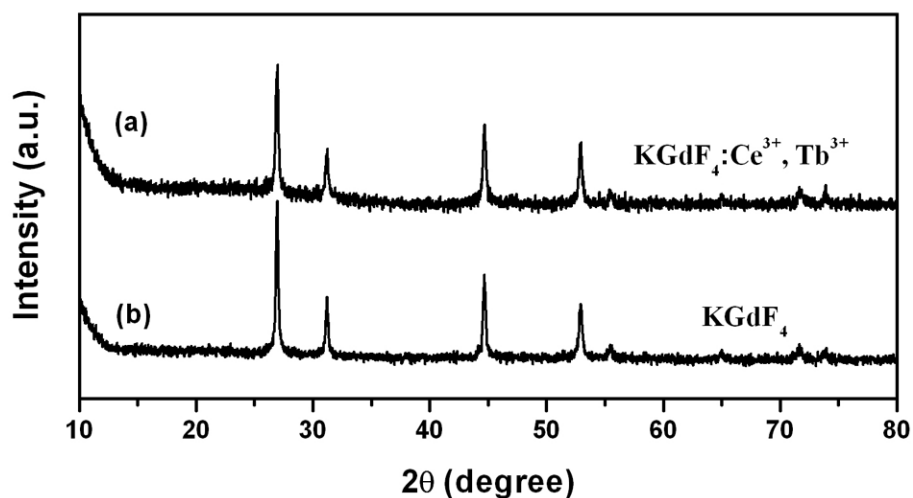

**Figure S1.** XRD patterns of  $\text{KGdF}_4:\text{Ce}^{3+}, \text{Tb}^{3+}$  (a) and  $\text{KGdF}_4$  NPs (b), respectively.

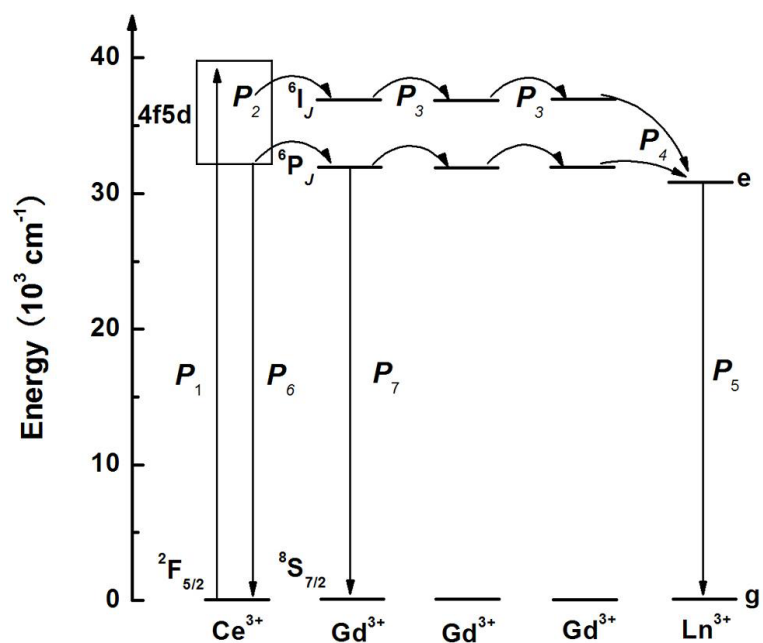

**Figure S2.** Schematic energy level diagram showing the luminescence mechanism in KGdF<sub>4</sub>: Ce<sup>3+</sup>, Ln<sup>3+</sup> nanoparticles.

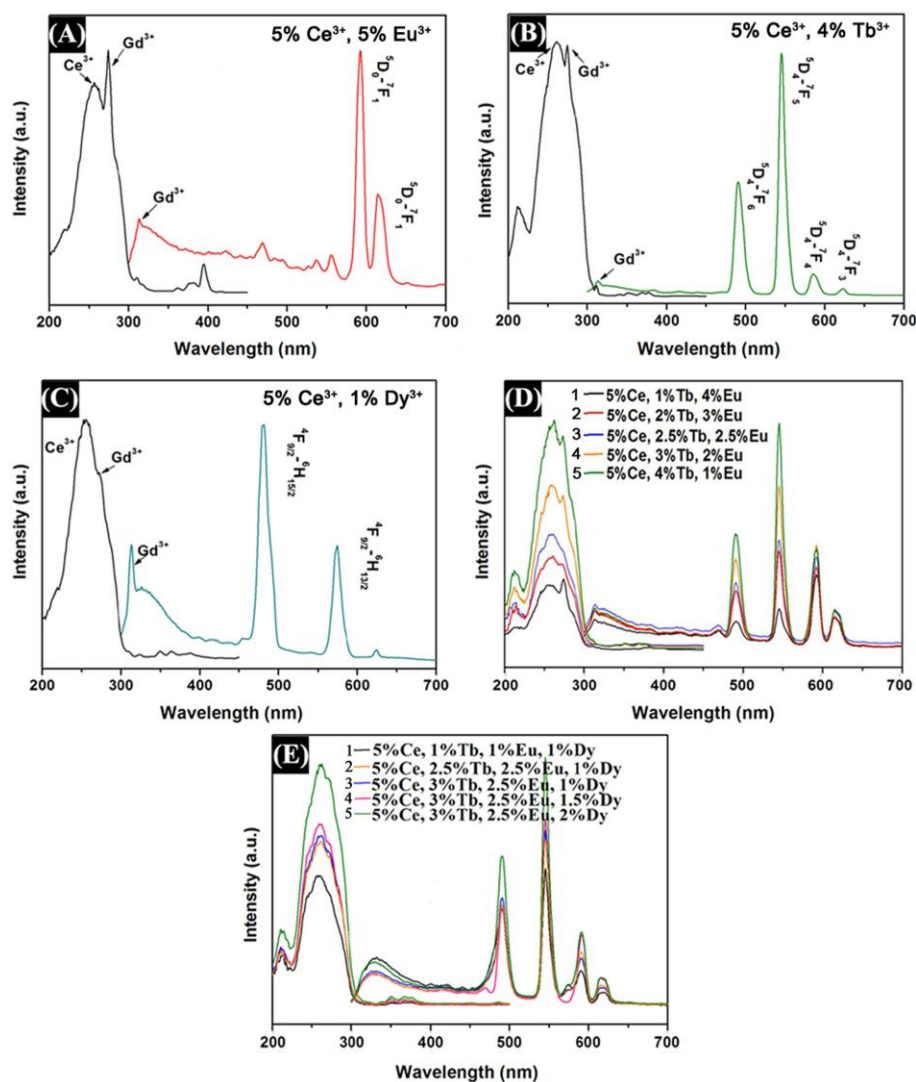

**Figure S3.** Excitation and emission spectra of KGdF<sub>4</sub>: Ce<sup>3+</sup>/Ln<sup>3+</sup> (Ln= Eu, Tb, Dy, Eu/Tb and Eu/Tb/Dy) nanoparticles (A-E).

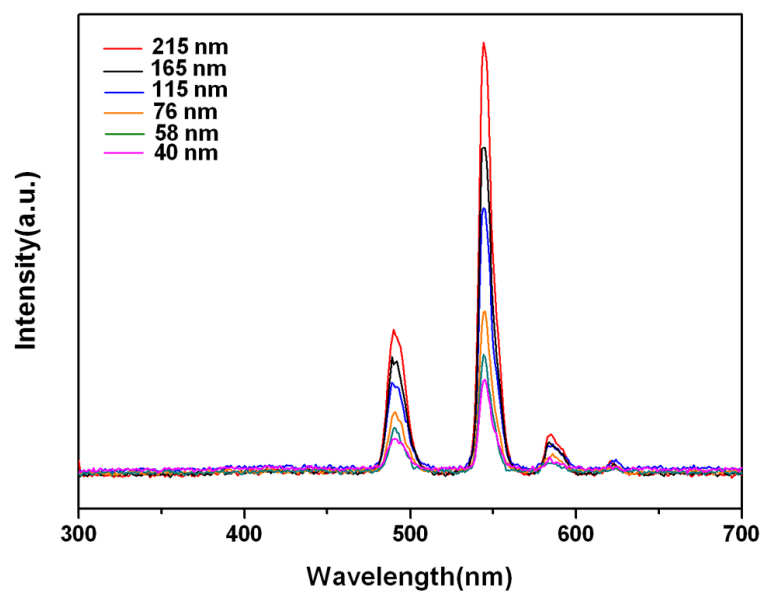

**Figure S4.** CL spectra of the KGdF<sub>4</sub>: 5% Ce<sup>3+</sup>, 4% Tb<sup>3+</sup> nanoparticles with different size. (accelerating voltage = 3 kV; filament current = 92.4 mA)

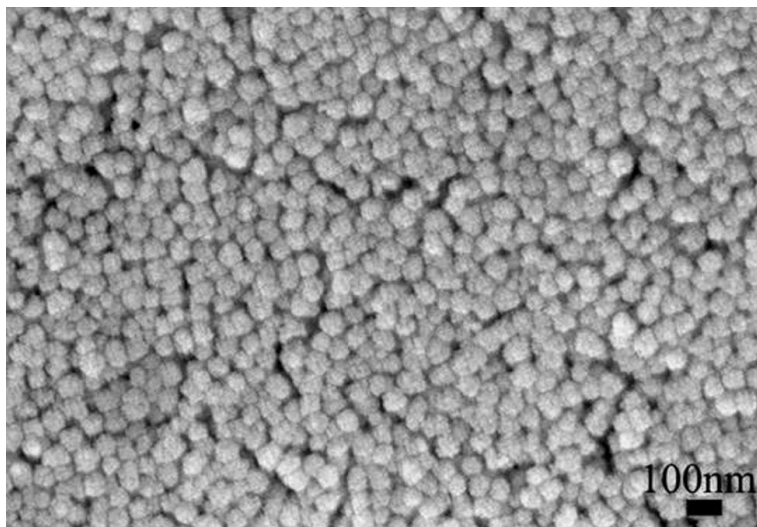

**Figure S5.** The SEM image of KGdF<sub>4</sub>: 5% Ce<sup>3+</sup>, 4% Tb<sup>3+</sup>@KGdF<sub>4</sub> nanoparticles as-prepared in the DEG/H<sub>2</sub>O = 50/0 mixed solvent.

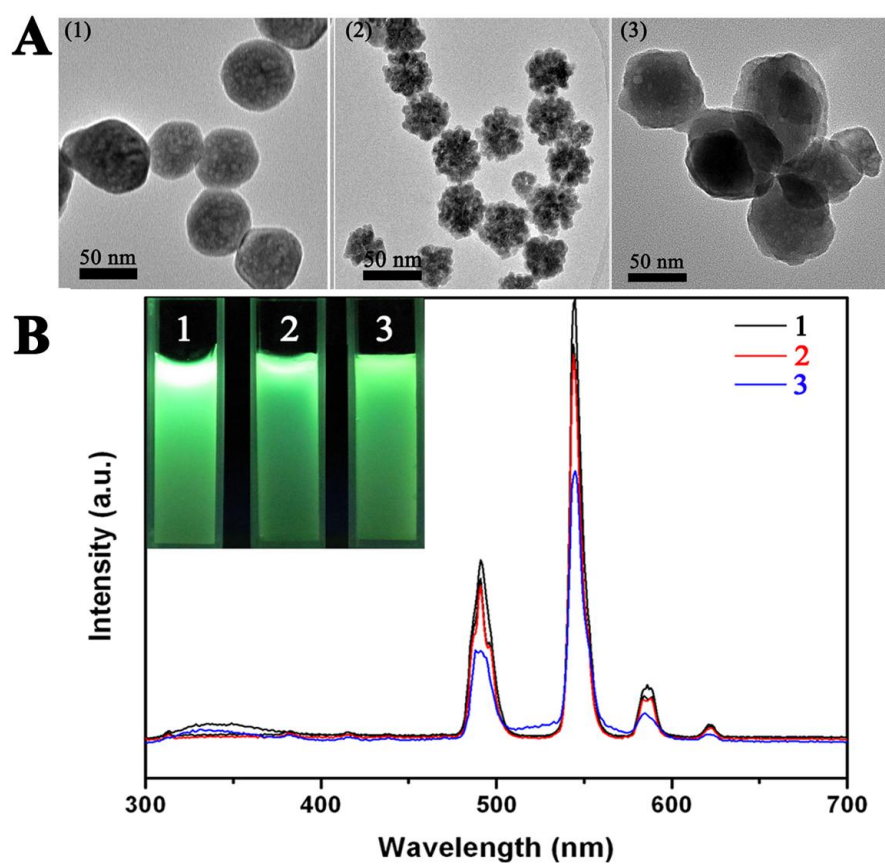

**Figure S6.** The TEM images of the  $\text{KGdF}_4:5\%\text{Ce}^{3+}$ ,  $5\%\text{Tb}^{3+}$  NPs prepared by solvothermal (A1), co-precipitation (A2) and hydrothermal method (A3), and their corresponding emission spectra and luminescence photos under UV lamp (B), respectively.

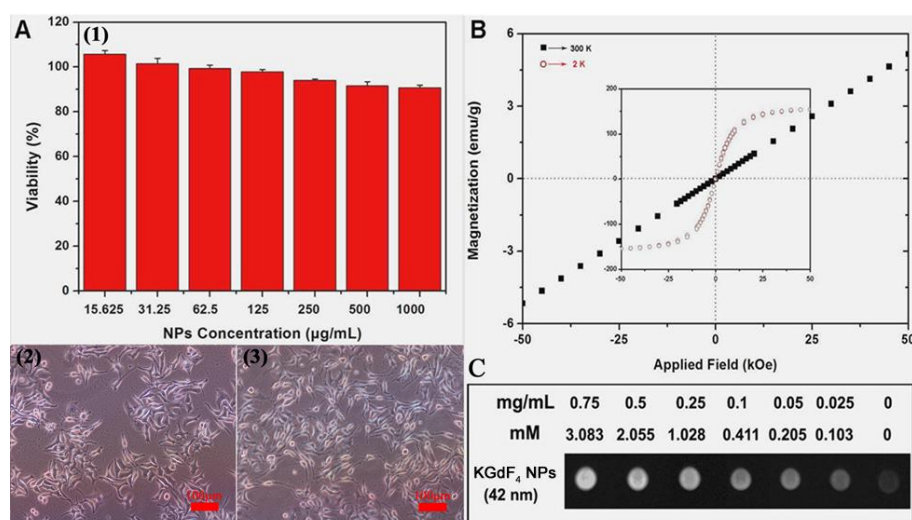

**Figure S7.** *In vitro* cell viability data of cultured L929 fibroblast cells after incubation with KGdF<sub>4</sub> NPs for 24 h using standard MTT colorimetric assay A(1) and fluorescence microscopy images of L929 cells incubated with KGdF<sub>4</sub> NPs for 0 h A(2) and 24 h A(3). Magnetization vs magnetic field of the KGdF<sub>4</sub> nanoparticles (B) and T<sub>1</sub>-weighted MR image of various mass and molar concentration of KGdF<sub>4</sub> nanoparticles in water (C).
